# Supplementary material
Source: PubMed Central journal article supplement (PMC4530750)
Supplement: SD6.pdf [file SD6.pdf]

SUPPLEMENTAL TABLE 1

Number of malaria cases imported from other countries, 2011–2013

| Country of origin            | Total | 2011  | 2012  | 2013  |
|------------------------------|-------|-------|-------|-------|
| Africa                       | 5,976 | 1,351 | 1,458 | 3,167 |
| Ghana                        | 1,660 | 88    | 241   | 1,331 |
| Angola                       | 843   | 277   | 151   | 415   |
| Equatorial Guinea            | 720   | 199   | 233   | 288   |
| Nigeria                      | 652   | 243   | 197   | 212   |
| Congo (Brazzaville)          | 179   | 62    | 43    | 74    |
| Guinea                       | 163   | 37    | 60    | 66    |
| Cameroon                     | 151   | 35    | 18    | 98    |
| Liberia                      | 128   | 15    | 45    | 68    |
| Sudan                        | 121   | 28    | 50    | 43    |
| Ethiopia                     | 112   | 26    | 30    | 56    |
| Sierra Leone                 | 108   | 16    | 42    | 50    |
| Gabon                        | 99    | 24    | 37    | 38    |
| Congo (Kinshasa)             | 99    | 26    | 36    | 37    |
| Mozambique                   | 88    | 25    | 20    | 43    |
| Zambia                       | 68    | 17    | 16    | 35    |
| Tanzania                     | 59    | 12    | 17    | 30    |
| Uganda                       | 57    | 14    | 16    | 27    |
| Chad                         | 57    | 18    | 11    | 28    |
| South Sudan                  | 45    | 4     | 16    | 25    |
| Côte d'Ivoire                | 44    | 13    | 17    | 14    |
| South Africa                 | 42    | 19    | 8     | 15    |
| Mali                         | 40    | 11    | 17    | 12    |
| Togo                         | 37    | 12    | 2     | 23    |
| Malawi                       | 28    | 9     | 10    | 9     |
| Benin                        | 27    | 3     | 5     | 19    |
| Libya                        | 20    | 7     | 3     | 10    |
| Madagascar                   | 16    | 8     | 5     | 3     |
| Kenya                        | 14    | 3     | 5     | 6     |
| Niger                        | 12    | 7     | 4     | 1     |
| The Central African Republic | 10    | 0     | 8     | 2     |
| Burkina Faso                 | 9     | 1     | 5     | 3     |
| Senegal                      | 8     | 3     | 5     | 0     |
| Egypt                        | 6     | 0     | 1     | 5     |
| Zimbabwe                     | 5     | 0     | 2     | 3     |
| Rwanda                       | 4     | 1     | 2     | 1     |
| Comoros                      | 3     | 2     | 0     | 1     |
| Algeria                      | 2     | 0     | 1     | 1     |
| Mauritania                   | 1     | 0     | 1     | 0     |
| Mauritius                    | 1     | 1     | 0     | 0     |
| Namibia                      | 1     | 1     | 0     | 0     |
| Somalia                      | 1     | 0     | 0     | 1     |
| Unknown                      | 236   | 84    | 78    | 74    |
| Southeast Asia               | 2,965 | 1,348 | 895   | 722   |
| Myanmar                      | 2,503 | 1,148 | 764   | 591   |
| Cambodia                     | 192   | 124   | 49    | 19    |
| Indonesia                    | 142   | 37    | 35    | 70    |
| Laos                         | 101   | 26    | 36    | 39    |
| East Timor                   | 7     | 4     | 3     | 0     |
| Vietnam                      | 7     | 2     | 5     | 0     |
| Thailand                     | 5     | 1     | 1     | 3     |
| Malaysia                     | 1     | 0     | 1     | 0     |
| Unknown                      | 7     | 6     | 1     | 0     |
| Southern Asia                | 113   | 33    | 45    | 35    |
| Pakistan                     | 72    | 21    | 29    | 22    |
| India                        | 35    | 8     | 14    | 13    |
| Bangladesh                   | 3     | 3     | 0     | 0     |
| Afghanistan                  | 2     | 0     | 2     | 0     |
| Sri Lanka                    | 1     | 1     | 0     | 0     |
| Eastern Asia                 | 3     | 0     | 2     | 1     |
| North Korea                  | 2     | 0     | 1     | 1     |
| Korea                        | 1     | 0     | 1     | 0     |
| Oceania                      | 19    | 5     | 6     | 8     |
| Papua New Guinea             | 19    | 5     | 6     | 8     |
| Latin America                | 7     | 0     | 1     | 6     |
| Guyana                       | 3     | 0     | 0     | 3     |
| Ecuador                      | 1     | 0     | 0     | 1     |
| Surinam                      | 1     | 0     | 0     | 1     |
| Brazil                       | 1     | 0     | 1     | 0     |
| Unknown                      | 202   | 121   | 21    | 61    |
| Total                        | 9,285 | 2,858 | 2,428 | 3,999 |
